# Supplementary material for: Fast two-step deposition of perovskite via mediator extraction treatment for large-area, high-performance perovskite solar cells
Source: Royal Society of Chemistry journal article supplement (doi:10.1039/c8ta02868k), 2018-01-01
Supplement: c8ta02868k1.pdf [file c8ta02868k1.pdf]

## **[Electronic Supplementary Information]**

Fast two-step deposition of perovskite via mediator  
extraction treatment for large-area, high-  
performance perovskite solar cells

*Young Yun Kim, Eun Young Park, Tae-Youl Yang, Jun Hong Noh, Tae Joo Shin, Nam Joong Jeon,  
Jangwon Seo\**

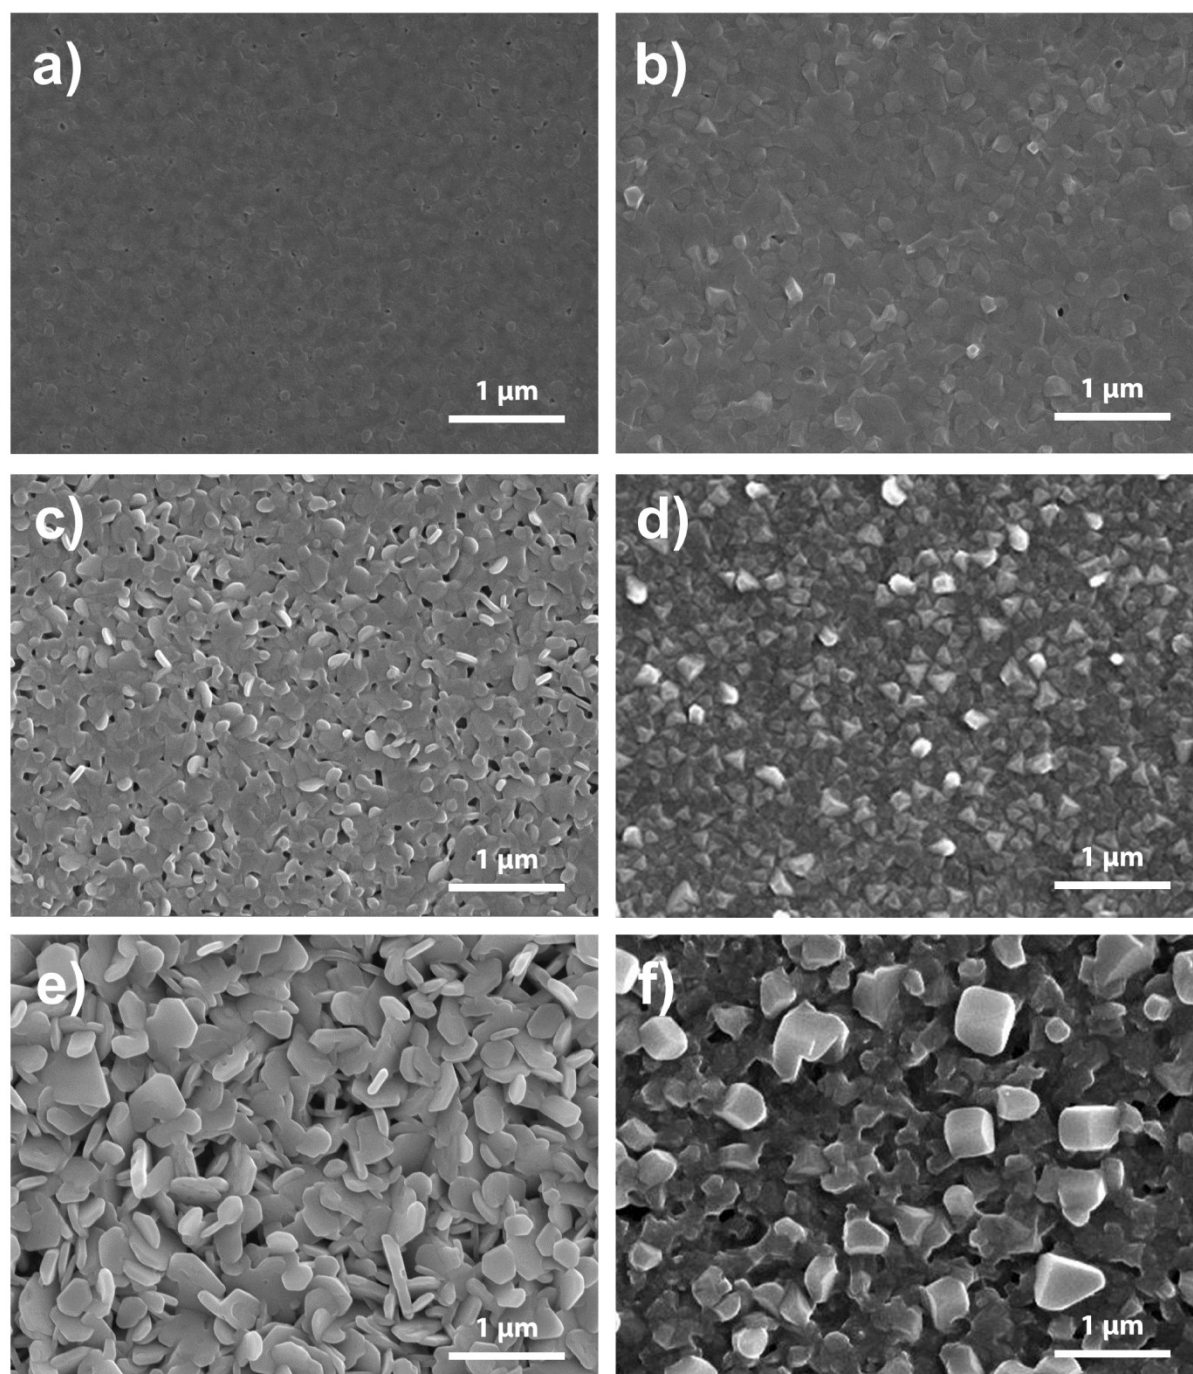

**Fig**

**ure S1.** SEM images of Pbl<sub>2</sub> films and after washing of DMSO by a) heat treatment, c) chlorobenzene, and e) water. SEM images of MAPbl<sub>3</sub> films prepared by subsequent dipping in MAI solution, for Pbl<sub>2</sub> films made by b) heat treatment, d) chlorobenzene, and f) water.

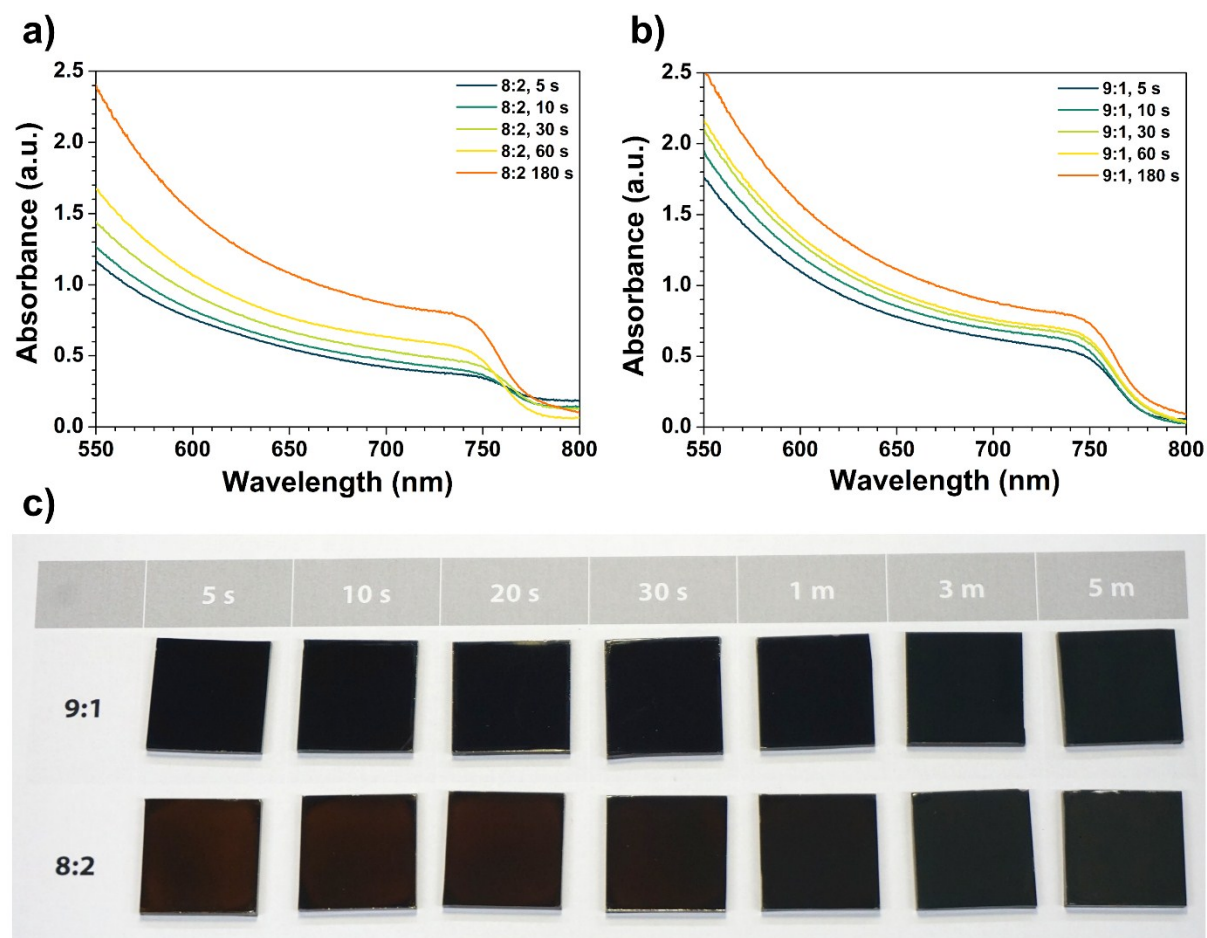

**Figure S2.** UV-vis spectra of perovskite film with different reaction time, for a) DMF:DMSO = 8:2, and b) 9:1. c) A photograph of perovskite films with different reaction time, showing fast reaction for DMF:DMSO = 9:1 than 8:2.

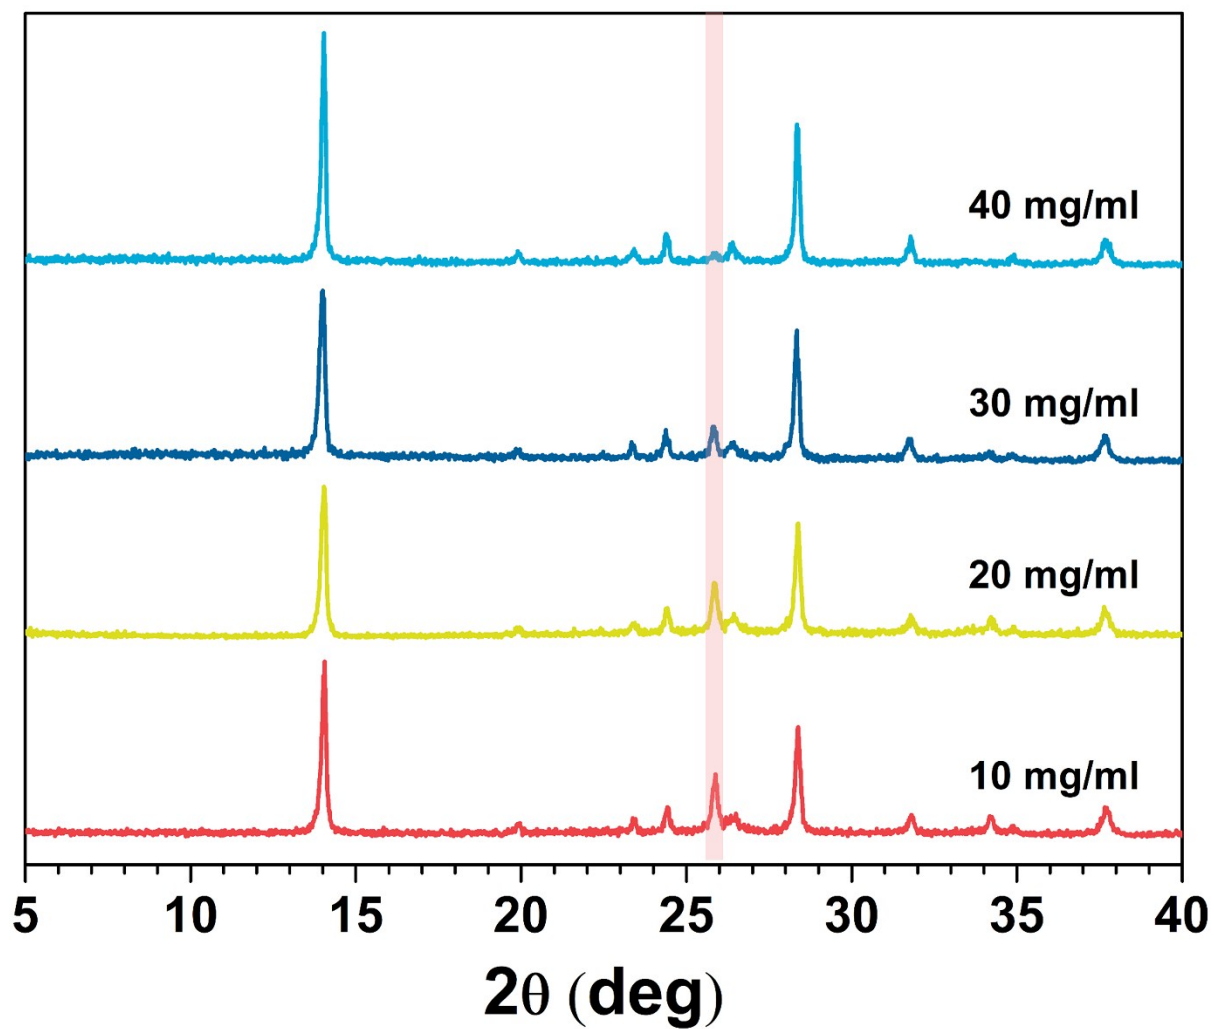

**Figure S3.** XRD spectra of MAPbI<sub>3</sub> films fabricated by dipping in different concentration of MAI solutions.

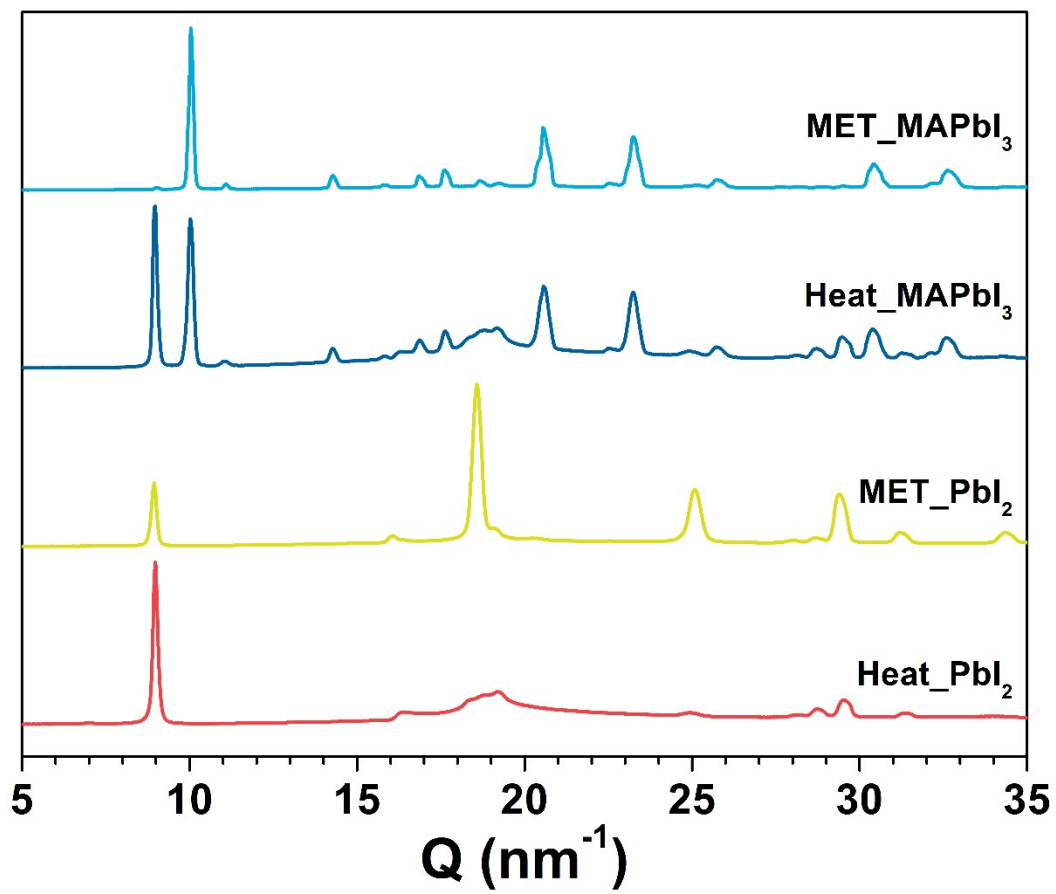

Fig

ure S4. Azimuthally integrated intensity plots calculated from GI-WAXS spectra.

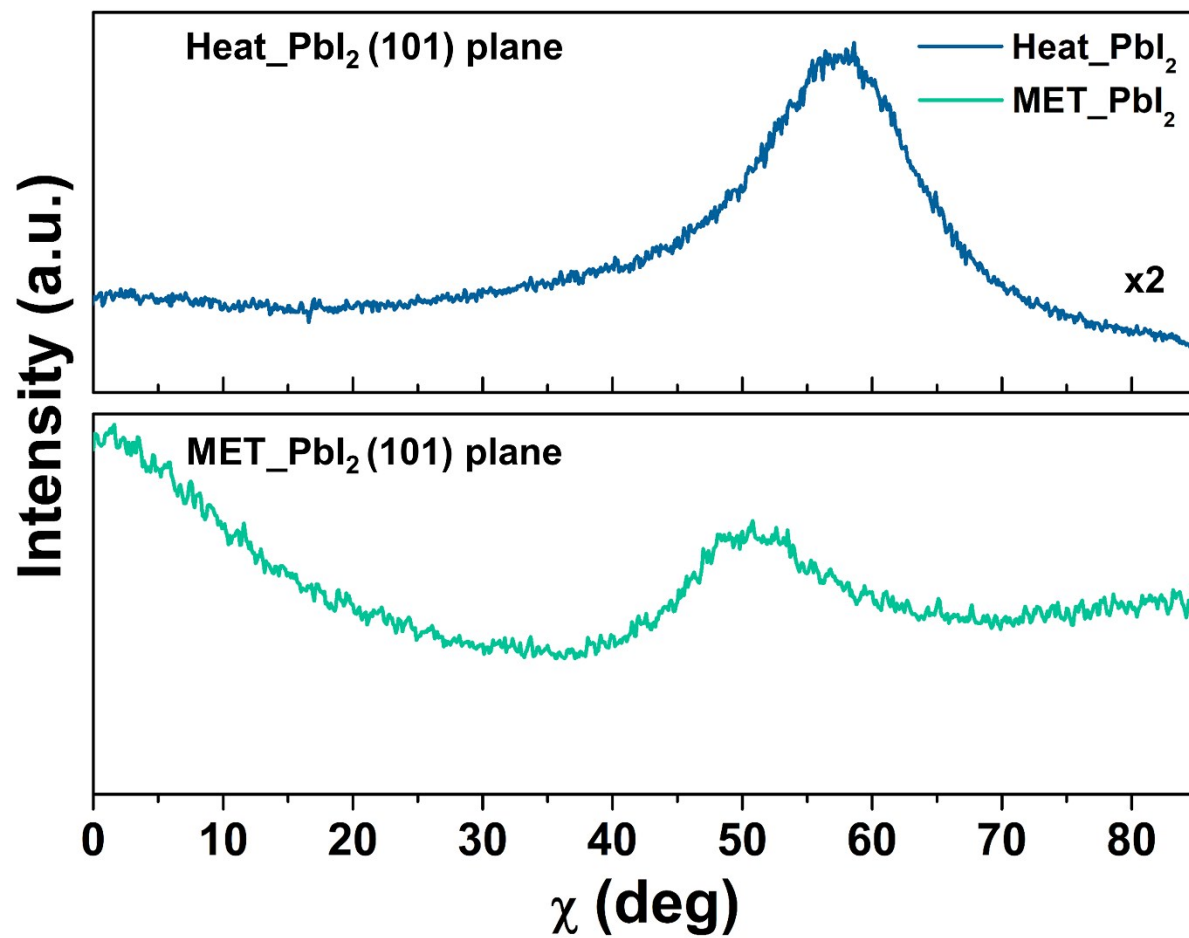

**Figure S5.** Radially integrated intensities of Pbl<sub>2</sub> films along the (101) plane.

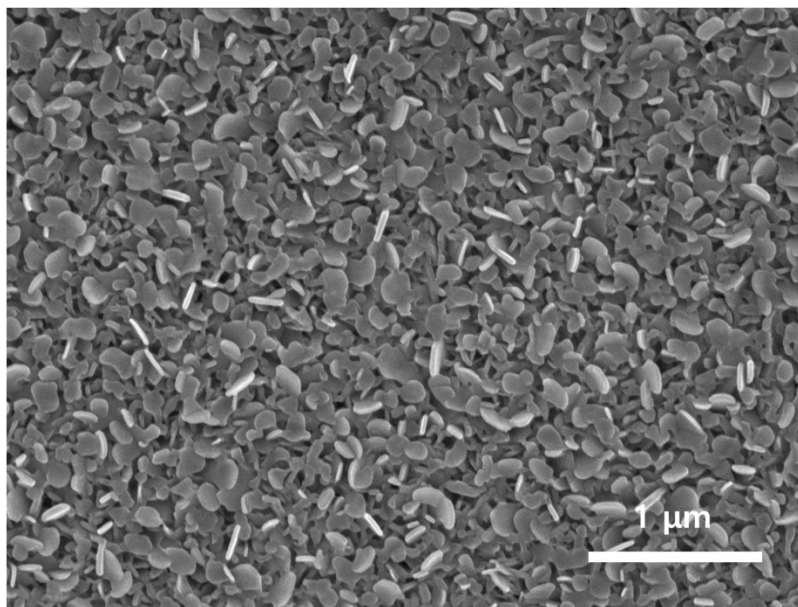

**Figure S6.** SEM image of PbI<sub>2</sub> film made by washing of DMSO by IPA for 2 min.

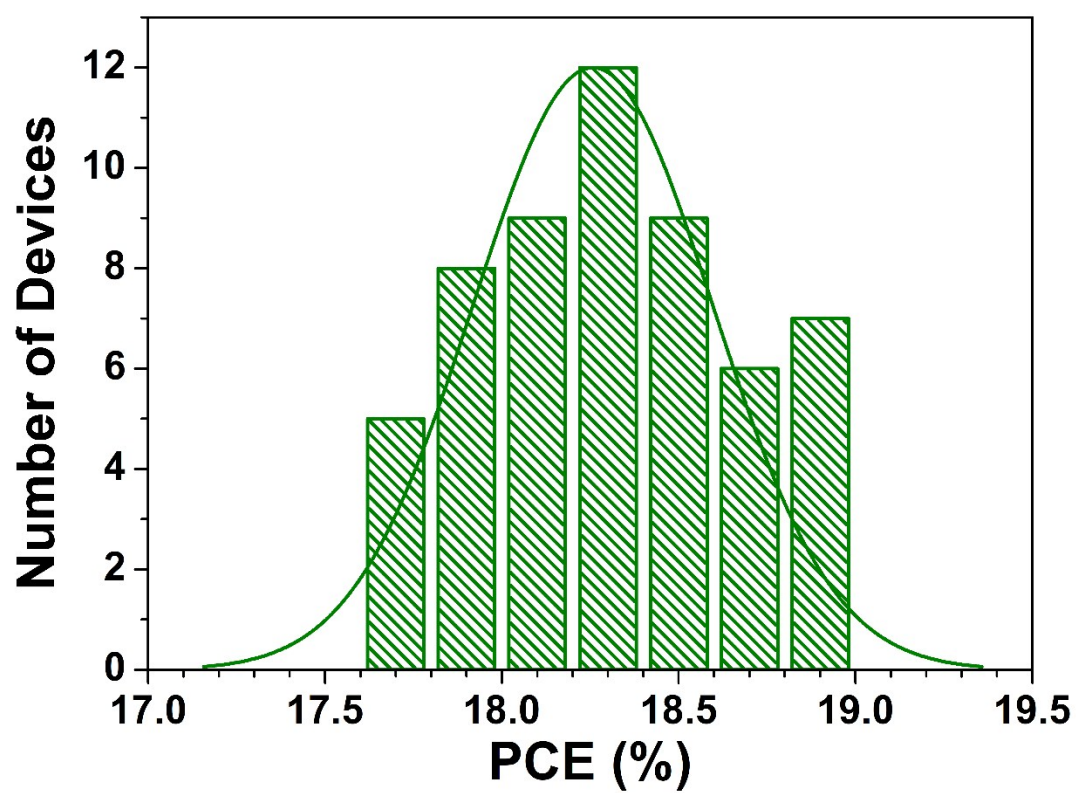

**Figure S7.** Histogram of PCEs for optimized solar cells made by MET.



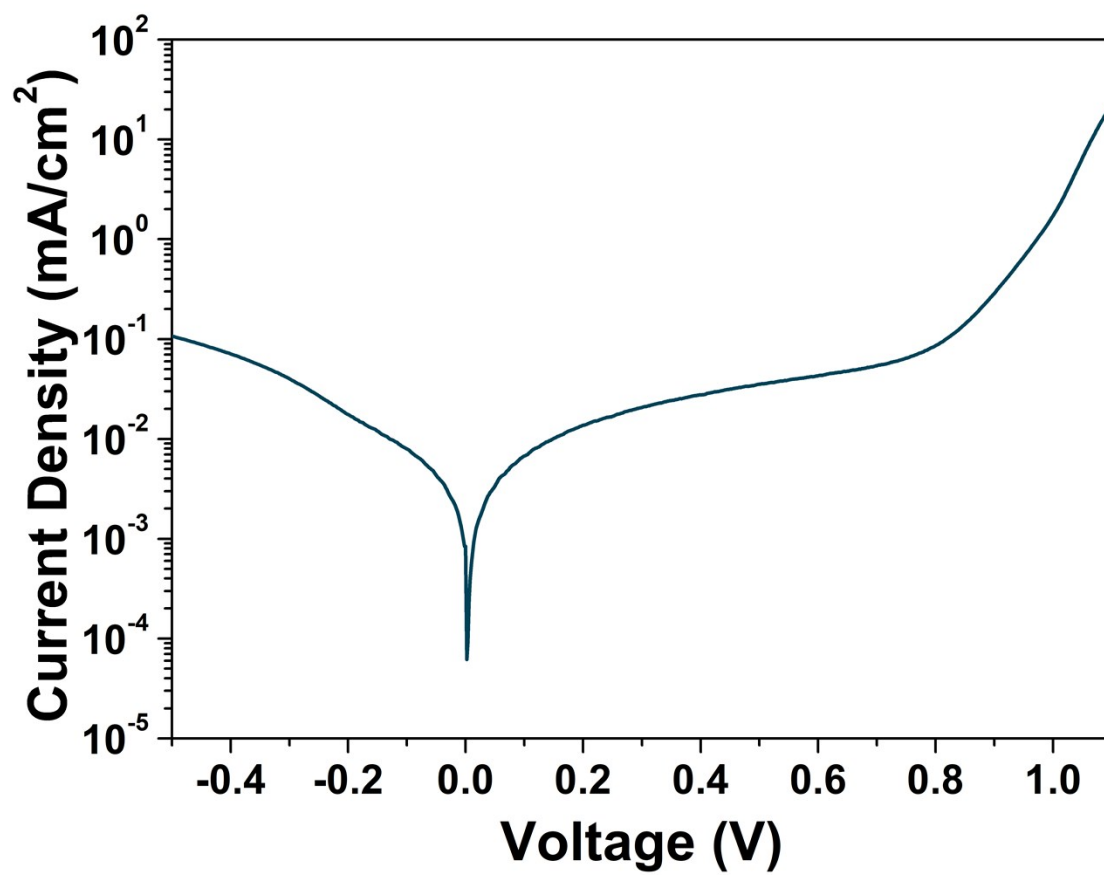

**Figure S8.** The dark J-V curve.

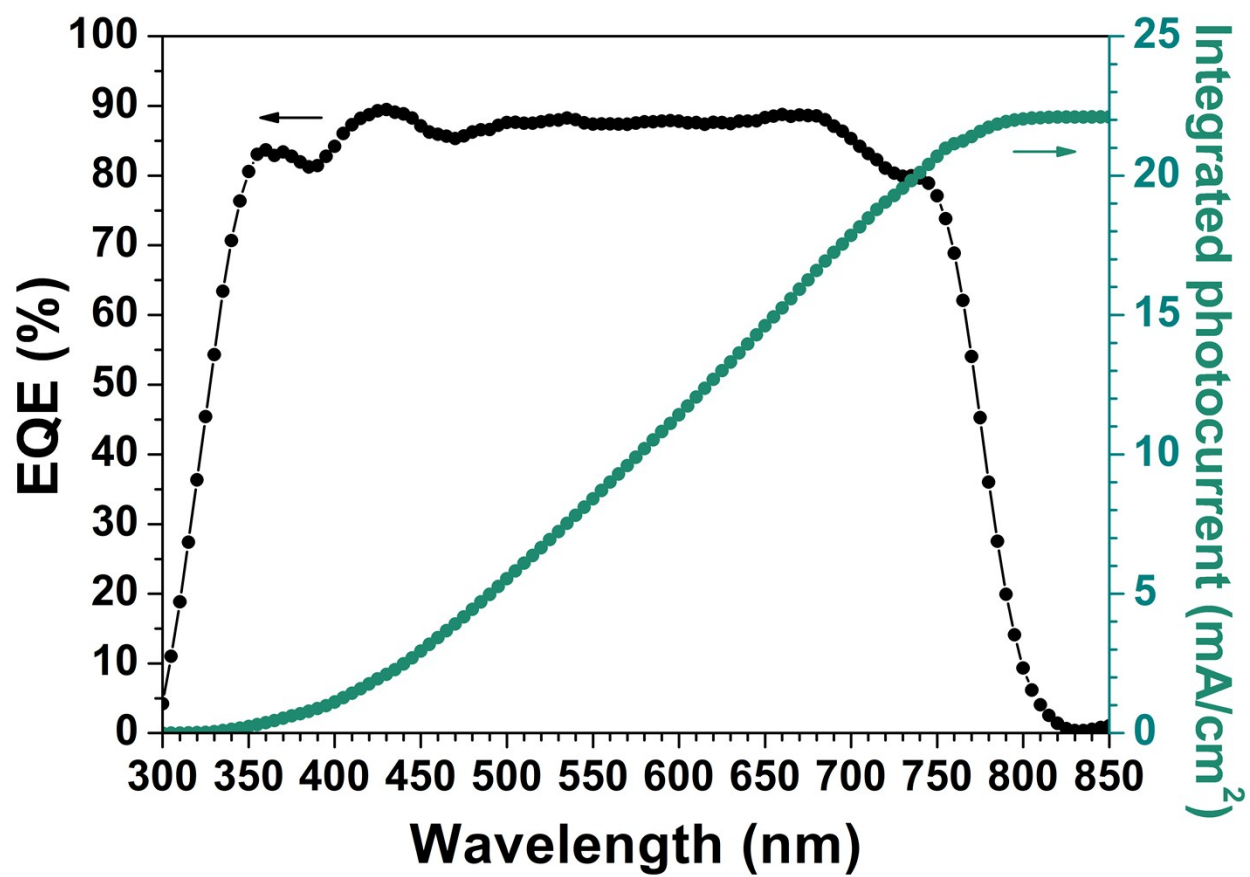

**Figure S9.** EQE spectrum and corresponding integrated photocurrent for the champion device.

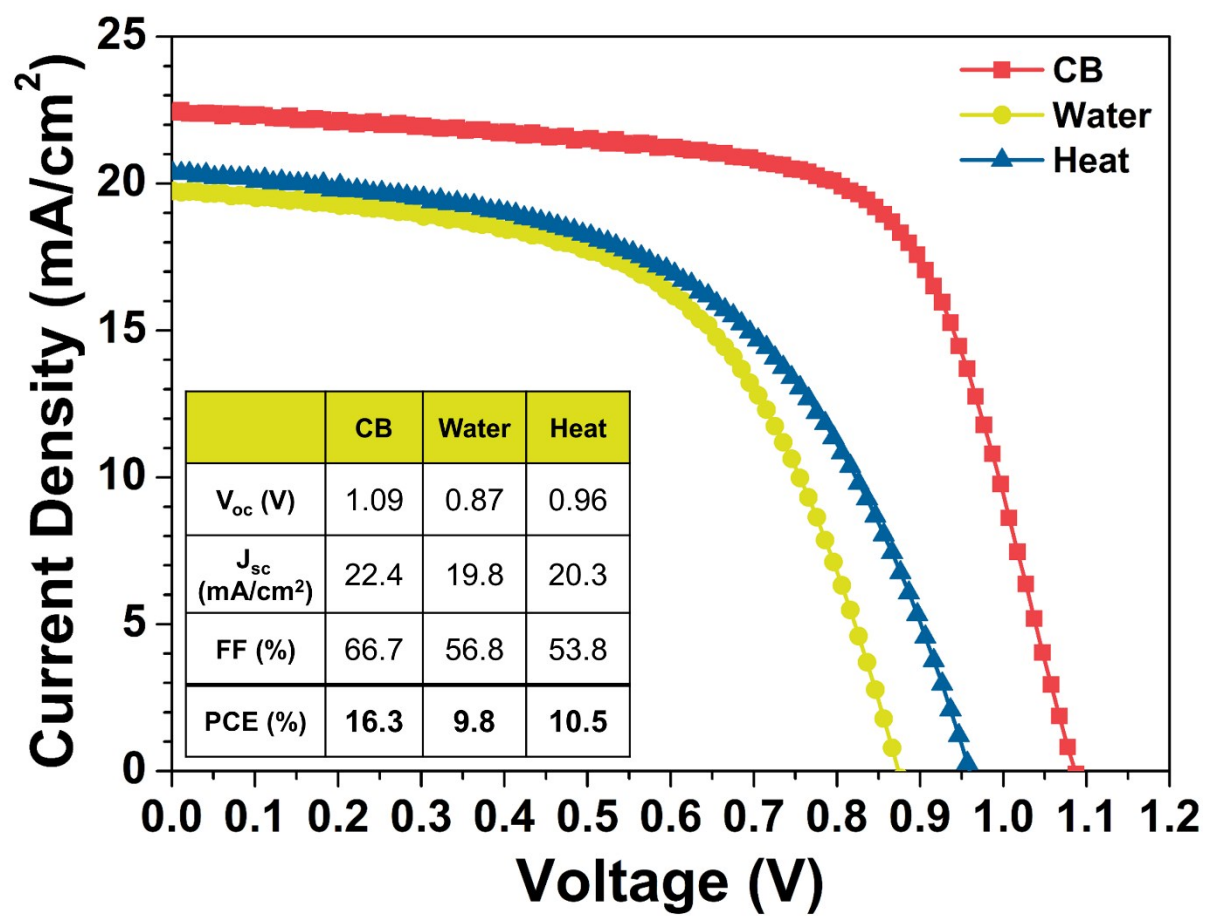

**Figure S10.** J-V curves of solar cells fabricated by different extraction solvent and treatment.

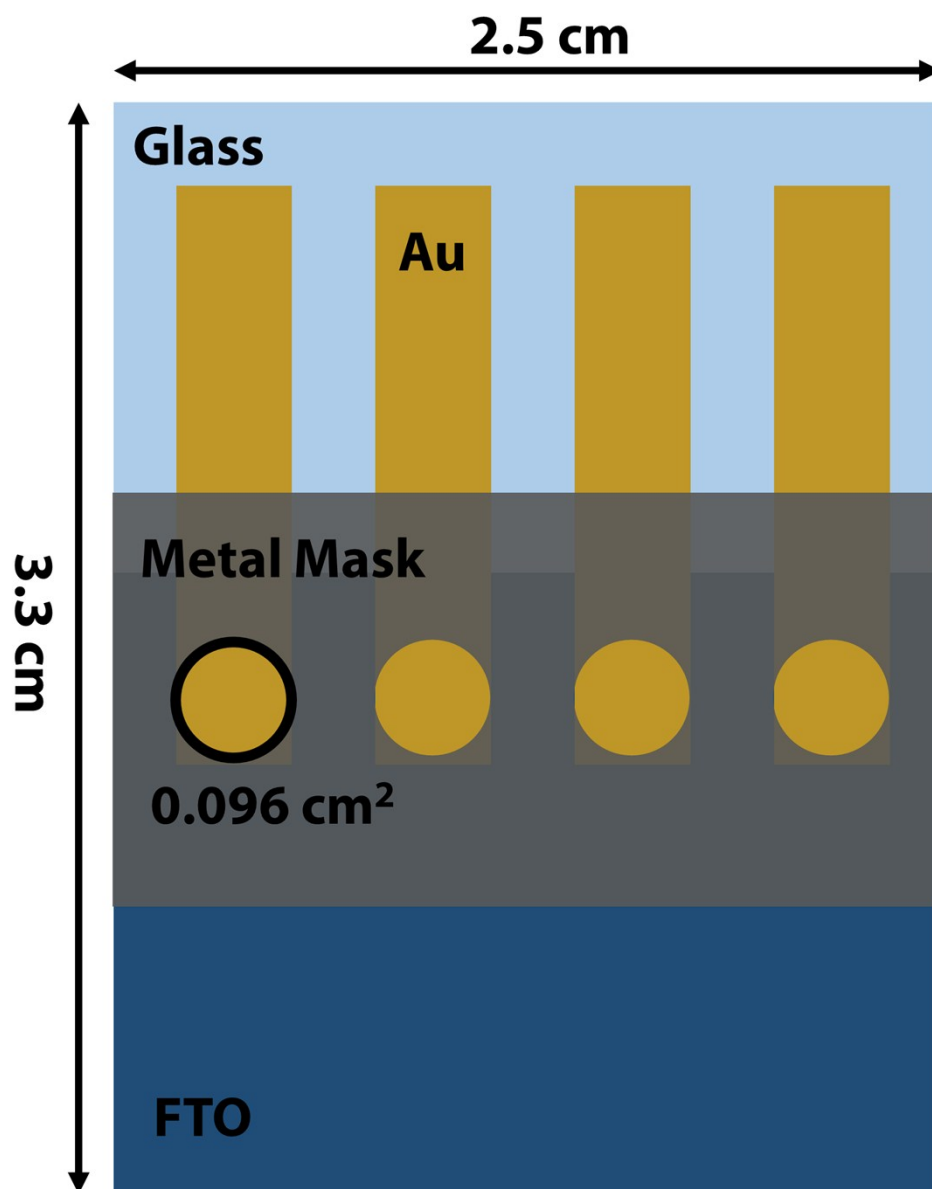

**Figure S11.** Schematic diagram of the structure of solar cells made by using slot-die coating.
